# Supplementary material
Source: PubMed Central journal article supplement (PMC4724040)
Supplement: supp_mcv162_aob-15442-s01.pdf [file supp_mcv162_aob-15442-s01.pdf]

## SUPPLEMENTAARY DATA

Table S1. Multilocus genotypes for 54 samples: 37 basal shoots, of which 17 were pairs of maternal (basal) and inflorescence-derived plantlets, and longitudinal sections to detect genetic mosaicism (UL36a-w and UL37 a-v). \* indicates samples tested for ploidy using flow cytometry.

| Sample | <i>PaA1</i> | <i>PaA105</i> | <i>PaA120</i> | <i>PaB6</i> | <i>PaB8</i> | <i>PaB112</i> | <i>PaD113</i> | Sample                    | Ploidy |
|--------|-------------|---------------|---------------|-------------|-------------|---------------|---------------|---------------------------|--------|
| UL6A   | 242273      | 225227229     | 194196        | 245245      | 204218      | 189189        | 195195        | basal shoot (maternal)    | *      |
| UL6B   | 242273      | 225227229     | 194196        | 245245      | 204218      | 189189        | 195195        | plantlet on inflorescence |        |
| UL8A   | 242273275   | 225225        | 194196198     | 245245      | 204218220   | 189189        | 195195        | basal shoot (maternal)    | *      |
| UL8B   | 242273275   | 225225        | 194196198     | 245245      | 204218220   | 189189        | 195195        | plantlet on inflorescence |        |
| UL12A  | -           | 225225        | 194196198     | 245245      | 204218220   | 189189        | 195195        | basal shoot (maternal)    |        |
| UL12B  | 242273      | 225225        | 194196198     | 245245      | 204218220   | 189189        | 195195        | plantlet on inflorescence |        |
| UL14A  | 242273      | 225227229     | 194196        | 245245      | 204218      | 185189        | 195195        | basal shoot (maternal)    | *      |
| UL14B  | 242273      | 225227229     | 194196        | 245245      | 204218      | 185189        | 195195        | plantlet on inflorescence |        |
| UL18A  | 242271273   | 225225        | 194196198     | 245245      | 204218220   | 189189        | 195195        | basal shoot (maternal)    | *      |
| UL18B  | 242271273   | 225225        | 194196198     | 245245      | 204218220   | 189189        | 195195        | plantlet on inflorescence |        |
| UL24A  | 242273      | 225227229     | 194196        | 245245      | 204218      | 185189        | 195195        | basal shoot (maternal)    |        |
| UL24B  | 242273      | 225227229     | 194196        | 245245      | 204218      | 185189        | 195195        | plantlet on inflorescence |        |
| UL25A  | 242273      | 225227229     | 194196        | -           | 204218      | 185189        | 195195        | basal shoot (maternal)    |        |
| UL25B  | 242273      | 225227229     | 194196        | -           | 204218      | 185189        | 195195        | plantlet on inflorescence |        |
| UL26A  | 242273      | 225227229     | 194196        | 245245      | 204218      | 185189        | 195195        | basal shoot (maternal)    |        |
| UL26B  | 242273      | 225227229     | 194196        | 245245      | 204218      | 185189        | 195195        | plantlet on inflorescence |        |
| UL27A  | 242273      | 225227229     | 194196        | 245245      | 204218      | 185189        | 195195        | basal shoot (maternal)    |        |
| UL27B  | 242273      | 225227229     | 194196        | 245245      | 204218      | 185189        | 195195        | plantlet on inflorescence |        |
| UL28A  | 242273      | 225227229     | 194196        | -           | 204218      | 185189        | 195195        | basal shoot (maternal)    |        |
| UL28B  | 242273      | 225227229     | 194196        | 245245      | 204218      | 185189        | 195195        | plantlet on inflorescence |        |
| UL29A  | 242273      | 225227229     | 194196        | 245245      | 204218      | 185189        | 195195        | basal shoot (maternal)    |        |

|       |           |           |           |        |           |           |        |                           |   |
|-------|-----------|-----------|-----------|--------|-----------|-----------|--------|---------------------------|---|
| UL29B | 242273    | 225227229 | 194196    | 245245 | 204218    | 185189    | 195195 | plantlet on inflorescence |   |
| UL30A | 242273275 | 225227    | 194196    | -      | 204218    | 185189    | 195195 | basal shoot (maternal)    | * |
| UL30B | 242273275 | 225227    | 194196    | -      | 204218    | 185189    | 195195 | plantlet on inflorescence |   |
| UL31A | 242273    | 225227229 | 194196    | -      | 204218    | 185189    | 195195 | basal shoot (maternal)    |   |
| UL31B | 242273    | 225227229 | 194196    | 245245 | 204218    | 185189    | 195195 | plantlet on inflorescence |   |
| UL32A | 242273    | 225227229 | 194196    | -      | 204218    | 185189    | 195195 | basal shoot (maternal)    |   |
| UL32B | 242273    | 225227229 | 194196    | 245245 | 204218    | 185189    | 195195 | plantlet on inflorescence |   |
| UL33A | 242273    | 225227229 | 194196    | 245245 | 204218    | 185189    | 195195 | basal shoot (maternal)    |   |
| UL33B | 242273    | 225227229 | 194196    | 245245 | 204218    | 185189    | 195195 | plantlet on inflorescence |   |
| UL34A | 242273    | 225227229 | 194196    | -      | 204218    | 185189    | 195195 | basal shoot (maternal)    |   |
| UL34B | 242273    | 225227229 | 194196    | -      | 204218    | 185189    | 195195 | plantlet on inflorescence |   |
| UL35A | 242273    | 225227229 | 194196    | -      | 204218    | 185189    | 195195 | basal shoot (maternal)    |   |
| UL35B | 242273    | 225227229 | 194196    | -      | 204218    | 185189    | 195195 | plantlet on inflorescence |   |
| UL1   | 242273    | 225227    | 194196    | 245245 | 204218    | 185189    | 195195 | basal shoot               |   |
| UL2   | 242273    | 225227    | 194196    | 245245 | 204218    | 185189    | 195195 | basal shoot               |   |
| UL3   | 242273    | 225227    | 194196    | 245245 | 204218    | 185189    | 195195 | basal shoot               |   |
| UL4   | 242273    | 225227    | 194196    | 245245 | 204218    | 185189    | 195195 | basal shoot               |   |
| UL5   | 242273    | 225227    | 196198    | 245245 | 204218    | 185189    | 195195 | basal shoot               | * |
| UL7   | 242273    | 225227    | 194196    | 245245 | 204218    | 185189    | 195195 | basal shoot               |   |
| UL9   | 242273    | 225227    | 194196    | 245245 | 204218    | 185189    | 195195 | basal shoot               |   |
| UL10  | 242265273 | 215225    | 194194    | -      | 204218220 | 185189    | 195195 | basal shoot               | * |
| UL11  | 242265273 | 215225    | 194194    | 245245 | 204218220 | 185189    | 195195 | basal shoot               |   |
| UL13  | 242273    | 225225    | 194196198 | 245245 | 204218220 | 189189    | 195195 | basal shoot               | * |
| UL15  | 242271273 | 225225    | 194194    | -      | 204218    | 185189195 | 195195 | basal shoot               | * |
| UL16  | 242273    | 225227229 | 194196    | 245245 | 204218    | 185189195 | 195195 | basal shoot               | * |
| UL17  | 242271273 | 215225    | 194194    | 245245 | 204218220 | 185189    | 195195 | basal shoot               | * |

|       |           |        |           |        |           |        |        |                      |   |
|-------|-----------|--------|-----------|--------|-----------|--------|--------|----------------------|---|
| UL19  | 242273    | 225225 | 194196198 | -      | 204218220 | 189189 | 195195 | basal shoot          |   |
| UL20  | 242271273 | 225225 | 194196198 | 245245 | 204218220 | 189189 | 195195 | basal shoot          |   |
| UL21  | 242273    | 215225 | 194194    | 245245 | 204218220 | 185189 | 195195 | basal shoot          | * |
| UL22  | 242265273 | 215225 | 194196    | 245245 | 204218220 | 185189 | 195195 | basal shoot          |   |
| UL23  | 242273    | 225225 | 194194    | 245245 | 204218    | 185189 | 195195 | basal shoot          | * |
| UL36  | 242273    | 215225 | 194194    | -      | 204218220 | 185189 | -      | basal shoot          |   |
| UL36a | 242273    | 215225 | 194194    | -      | 204218220 | 185189 | -      | longitudinal section |   |
| UL36b | -         | 215225 | 194194    | -      | 204218220 | 185189 | -      | longitudinal section |   |
| UL36c | 242273    | 215225 | 194194    | -      | 204218220 | 185189 | -      | longitudinal section |   |
| UL36d | 242273    | 215225 | 194194    | -      | 204218220 | 185189 | -      | longitudinal section |   |
| UL36e | -         | 215225 | 194194    | -      | 204218220 | 185189 | -      | longitudinal section |   |
| UL36f | 242273    | 215225 | 194194    | -      | 204218220 | 185189 | -      | longitudinal section |   |
| UL36g | 242273    | 215225 | 194194    | -      | 204220    | 185189 | -      | longitudinal section |   |
| UL36h | 242273    | 215225 | 194194    | -      | 204218220 | 185189 | -      | longitudinal section |   |
| UL36i | 242273    | 215225 | 194194    | -      | 204218220 | 185189 | -      | longitudinal section |   |
| UL36j | 242273    | 215225 | 194194    | -      | 204218220 | 185189 | -      | longitudinal section |   |
| UL36k | 242273    | 215225 | 194194    | -      | 204218220 | 185189 | -      | longitudinal section |   |
| UL36l | 242273    | 215225 | 194194    | -      | 204218220 | 185189 | -      | longitudinal section |   |
| UL36m | 242273    | 215225 | 194194    | -      | 204218220 | 185189 | -      | longitudinal section |   |
| UL36n | 242273    | 215225 | 194194    | -      | 204218220 | 185189 | -      | longitudinal section |   |
| UL36o | 242273    | 215225 | 194194    | -      | 204218220 | 185189 | -      | longitudinal section |   |
| UL36p | 242273    | 215225 | 194194    | -      | 204218220 | 185189 | -      | longitudinal section |   |
| UL36q | 242273    | 215225 | 194194    | -      | 204218220 | 185189 | -      | longitudinal section |   |
| UL36r | 242273    | 215225 | 194194    | -      | 204218220 | 185189 | -      | longitudinal section |   |
| UL36s | 242273    | 215225 | 194194    | -      | 204218220 | 185189 | -      | longitudinal section |   |
| UL36t | 242273    | 215225 | 194194    | -      | 204218220 | 185189 | -      | longitudinal section |   |

|       |        |           |        |   |           |        |   |                      |
|-------|--------|-----------|--------|---|-----------|--------|---|----------------------|
| UL36u | 242273 | 215225    | 194194 | - | 204218220 | 185189 | - | longitudinal section |
| UL36v | 242273 | 215225    | 194194 | - | 204218220 | 185189 | - | longitudinal section |
| UL36w | 242273 | 215225    | 194194 | - | 204218220 | 185189 | - | longitudinal section |
| UL37  | 242273 | 225227229 | 194196 | - | 204218    | 185189 | - | basal shoot          |
| UL37a | 242273 | 225227229 | 194196 | - | 204218    | 185189 | - | longitudinal section |
| UL37b | 242273 | 225227229 | 194196 | - | 204218    | 185189 | - | longitudinal section |
| UL37c | 242273 | -         | 194196 | - | 204218    | 185189 | - | longitudinal section |
| UL37d | 242273 | 225227229 | 194196 | - | 204218    | 185189 | - | longitudinal section |
| UL37e | 242273 | 225227229 | 194196 | - | 204218    | 185189 | - | longitudinal section |
| UL37f | 242273 | 225227229 | 194196 | - | 204218    | 185189 | - | longitudinal section |
| UL37g | 242273 | 225227229 | 194196 | - | 204218    | 185189 | - | longitudinal section |
| UL37h | 242273 | 225227229 | 194196 | - | 204218    | 185189 | - | longitudinal section |
| UL37i | 242273 | 225227229 | 194196 | - | 204218    | 185189 | - | longitudinal section |
| UL37j | 242273 | 225227229 | 194196 | - | 204218    | 185189 | - | longitudinal section |
| UL37k | 242273 | 225227229 | 194196 | - | 204218    | 185189 | - | longitudinal section |
| UL37l | 242273 | 225227229 | 194196 | - | 204218    | 185189 | - | longitudinal section |
| UL37m | 242273 | 225227229 | 194196 | - | 204218    | 185189 | - | longitudinal section |
| UL37n | 242273 | 225227229 | 194196 | - | 204218    | 185189 | - | longitudinal section |
| UL37o | 242273 | 225227229 | 194196 | - | 204218    | 185189 | - | longitudinal section |
| UL37p | 242273 | 225227229 | 194196 | - | 204218    | 185189 | - | longitudinal section |
| UL37q | 242273 | 225227229 | 194196 | - | 204218    | 185189 | - | longitudinal section |
| UL37r | 242273 | 225227229 | 194196 | - | 204218    | 185189 | - | longitudinal section |
| UL37s | 242273 | 225227229 | 194196 | - | 204218    | 185189 | - | longitudinal section |
| UL37t | 242273 | 225227229 | 194196 | - | 204218    | 185189 | - | longitudinal section |
| UL37u | 242273 | -         | 194196 | - | 204218    | 185189 | - | longitudinal section |
| UL37v | 242273 | 225227229 | 194196 | - | 204218    | 185189 | - | longitudinal section |
